# Supplementary material
Source: PubMed Central journal article supplement (PMC7351023)
Supplement: NIHMS1580046-supplement-FigS1__TableS2__TableS4.pdf [file NIHMS1580046-supplement-FigS1__TableS2__TableS4.pdf]

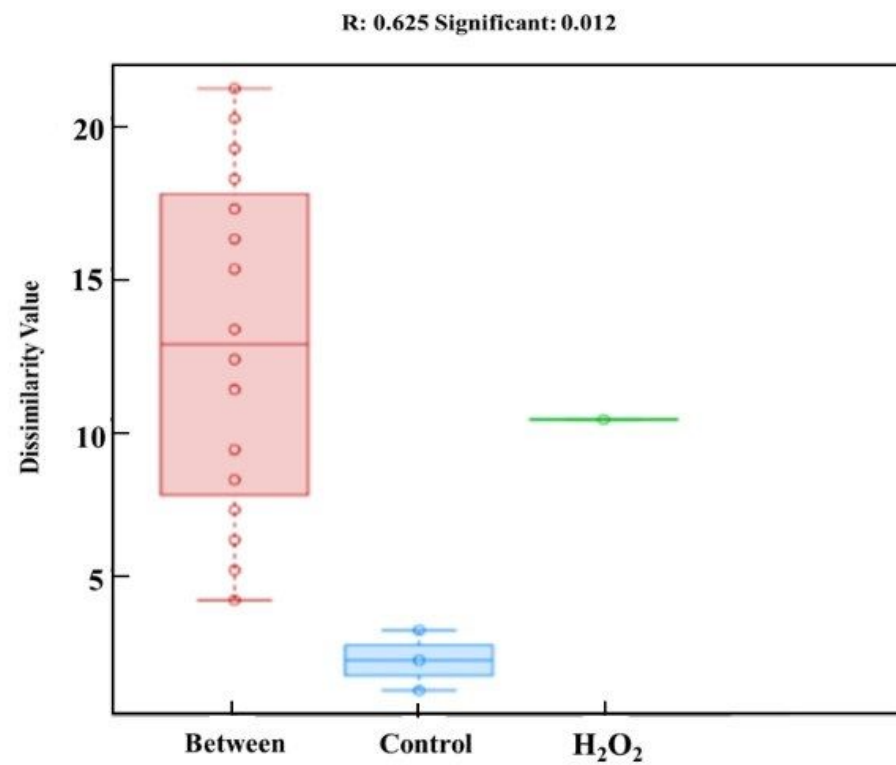

Figure S1. Comparison of the intra-group differences in the expression levels of genes in the control and the H<sub>2</sub>O<sub>2</sub>-elicited sample.

**Table S2. Statistics of the transcriptomic analysis****Table S2A. Gene mapping statistics**

|                              | Control-1            | Control-2            | Control-3            | H <sub>2</sub> O <sub>2</sub> -1 | H <sub>2</sub> O <sub>2</sub> -2 |
|------------------------------|----------------------|----------------------|----------------------|----------------------------------|----------------------------------|
| Total reads                  | 47,069,028 (100.00%) | 54,373,304 (100.00%) | 52,032,746 (100.00%) | 50,900,752 (100.00%)             | 44,998,414 (100.00%)             |
| Total mapped                 | 44,554,976 (94.66%)  | 51,334,599 (94.41%)  | 48,978,449 (94.13%)  | 47,979,752 (94.26%)              | 42,798,219 (95.11%)              |
| Multiple mapped              | 42,690,974 (90.70%)  | 49,096,450 (90.30%)  | 46,06,961 (89.96%)   | 45,968,784 (90.31%)              | 40,947,436 (91.00%)              |
| Uniquely mapped              | 1,864,002 (3.96%)    | 2,238,149 (4.12%)    | 2,171,488 (4.17%)    | 2,010,968 (3.95%)                | 1,850,783 (4.11%)                |
| Reads map to '+'             | 942,404 (2.00%)      | 1,130,786 (2.08%)    | 1,096,968 (2.11%)    | 1,017,238 (2.00%)                | 932,389 (2.07%)                  |
| Reads map to '-'             | 921,598 (1.96%)      | 1,107,363 (2.04%)    | 1,074,520 (2.07%)    | 993,730 (1.95%)                  | 918,394 (2.04%)                  |
| Non-splice reads             | 1,864,002 (3.96%)    | 2,238,149 (4.12%)    | 2,171,488 (4.17%)    | 2,010,968 (3.95%)                | 1,850,783 (4.11%)                |
| Splice reads                 | 0 (0.00%)            | 0 (0.00%)            | 0 (0.00%)            | 0 (0.00%)                        | 0 (0.00%)                        |
| Reads mapped in proper pairs | 1,694,950 (3.60%)    | 2,036,422 (3.75%)    | 1,984,254 (3.81%)    | 1,828,442 (3.59%)                | 1,674,742 (3.72%)                |

Total reads: The number of reads after quality inspection (clean data)

Total mapped: The number of reads that can be matched to the reference sequence

Multiple mapped: The number of reads with multiple matching positions on the reference sequence

Unique mapped: The number of reads with only one matching position on the reference sequence

Reads map to '+', Reads map to '-': The number of reads mapped to the sense (+) or the nonsense (-) strands on the reference sequence (only the Unique Mapped reads are investigated)

Non splice reads: The number of reads that match the sequence of a single exon

Splice reads: The number of reads that overlap two exons (also known as junction reads)

Reads mapped in proper pairs: The number of two end reads matching to reference sequence at the same time.

**Table S2B. Gene assembly statistics**

|                   | No.     | >=500bp | >=1000bp | N50   | N90   | Maximum length | Minimum length | Total length | Average length |
|-------------------|---------|---------|----------|-------|-------|----------------|----------------|--------------|----------------|
| <b>Transcript</b> | 120,623 | 85,543  | 73,702   | 5,368 | 1,712 | 28,619         | 201            | 343,306,921  | 2,846          |
| <b>Unigene</b>    | 34,512  | 9,384   | 5,470    | 3,310 | 271   | 28,619         | 201            | 31,328,723   | 908            |

**Table S4. Potential biosynthetic genes involved in antrodin C production**

| <b>Gene ID</b>        | <b>Protein ID</b> | <b>Query cover (%)</b> | <b>E value</b> | <b>Percent identity (%)</b> | <b>Predicted Function</b>                  | <b>Matching gene name</b> |
|-----------------------|-------------------|------------------------|----------------|-----------------------------|--------------------------------------------|---------------------------|
| TRINITY_DN12797_c0_g1 | gi 598002407      | 97                     | 3.00E-70       | 36.69                       | WD40                                       | poxJ/paeD                 |
| TRINITY_DN19315_c0_g1 | gi 758349692      | 96                     | 2.00E-93       | 42.05                       | Branched chain amino acid aminotransferase | poxL/paeG                 |
| TRINITY_DN12945_c0_g4 | gi 597935992      | 90                     | 2.00E-49       | 23.21                       | Nonribosomal peptide synthetases (NRPS)    | poxE/paeO                 |
| TRINITY_DN12960_c2_g1 | gi 1023204788     | 93                     | 2.00E-25       | 25.78                       | Cytochrome P450                            | poxC/paeM                 |
| TRINITY_DN12230_c0_g1 | gi 1023270917     | 91                     | 1.00E-15       | 22.16                       | Cytochrome P450                            | poxM/paeH                 |
| TRINITY_DN12021_c0_g1 | gi 1023274070     | 31                     | 2.00E-09       | 26.98                       | Cytochrome P450                            | poxD/paeN                 |
